# Supplementary material for: Characterization of the Multidimensional Functional Space of the Aquatic Macroinvertebrate Assemblages in a Biosphere Reserve (Central México)
Source: MDPI journal article supplement (doi:10.3390/d13110546), 2021-10-29
Supplement: s1 [file s1]

# Supplementary Tables

Table S1: List of macroinvertebrate families and abbreviations.

| Familiy             | Abbrevation |
|---------------------|-------------|
| Acanthametropodidae | Acan        |
| Ancylidae           | Ancy        |
| Aphididae           | Aphi        |
| Asellidae           | Asel        |
| Baetidae            | Baet        |
| Belostomatidae      | Belo        |
| Blaberidae          | Blabe       |
| Calamoceratidae     | Calamo      |
| Calopterygidae      | Calop       |
| Ceratopogonidae     | Cerato      |
| Chironomidae        | Chiro       |
| Chrysomelidae       | Chryso      |
| Cicadelidae         | Cica        |
| Coenagrionidae      | Coena       |
| Collembola          | Collem      |
| Corbiculidae        | Corbi       |
| Corixidae           | Corix       |
| Corydalidae         | Cory        |
| Crambidae           | Cramb       |
| Culicidae           | Culi        |
| Curculionidae       | Curcu       |
| Dixidae             | Dixi        |
| Dolichopodidae      | Doli        |
| Dryopidae           | Dryo        |
| Dytiscidae          | Dyti        |
| Ecnomidae           | Ecno        |
| Elmidae             | Elmi        |
| Empididae           | Empi        |
| Ephydridae          | Ephy        |
| Georissidae         | Geor        |
| Gerridae            | Gerri       |
| Glossiphoniidae     | Glossi      |
| Glossosomatidae     | Glosso      |
| Gomphidae           | Gomph       |
| Gyrinidae           | Gyri        |
| Haliplidae          | Hali        |
| Haplotaxida         | Haplo       |
| Hebridae            | Hebri       |
| Helicopsychidae     | Heli        |
| Heptageniidae       | Hept        |
| Hydraenidae         | Hydra       |
| Hydrobiosidae       | Hydrob      |
| Hydrometridae       | Hydrom      |

|                   |         |
|-------------------|---------|
| Hydrophilidae     | Hydrop  |
| Hydropsychidae    | Hydrops |
| Hydroptilidae     | Hydropt |
| Hypogastruridae   | Hypo    |
| Lampyridae        | Lamp    |
| Leptoceridae      | Lept    |
| Leptohyphidae     | Leptoh  |
| Leptophlebiidae   | Leptop  |
| Libellulidae      | Libell  |
| Lumbriculidae     | Lumb    |
| Lutrochidae       | Lutro   |
| Macromiidae       | Macrom  |
| Macroveliidae     | Macrov  |
| Mesovellidae      | Meso    |
| Muscidae          | Musc    |
| Naucoridae        | Nau     |
| Nepidae           | Nep     |
| Noctuidae         | Noct    |
| Notonectidae      | Noto    |
| Ochteridae        | Ocht    |
| Odontoceridae     | Odon    |
| Oligochaeta       | Olig    |
| Ostracoda         | Ostr    |
| Perlidae          | Per     |
| Philopotamidae    | Phil    |
| Physidae          | Phys    |
| Pisidiidae        | Pisi    |
| Planariidae       | Plan    |
| Planorbidae       | Plano   |
| Platystictidae    | Plat    |
| Polycentropodidae | Poly    |
| Psephenidae       | Pseph   |
| Psychodidae       | Psych   |
| Pyralidae         | Pyra    |
| Saldidae          | Sald    |
| Scirtidae         | Scirt   |
| Simuliidae        | Simu    |
| Staphylinidae     | Staph   |
| Stratiomyidae     | Stra    |
| Tabanidae         | Taba    |
| Thiaridae         | Thia    |
| Tipulidae         | Tipu    |
| Trombidiformes    | Trom    |
| Veliidae          | Veli    |
| Xiphocentronidae  | Xipho   |

Table S2: Functional traits.

| Trait                          | Abbreviations |
|--------------------------------|---------------|
| Body size < 0.25 cm            | BS_<0.25cm    |
| Body size: 0.25-0.5 cm         | BS_0.25-0.5cm |
| Body size: 0.5-1 cm            | BS_0.5-1 cm   |
| Body size: 1-2 cm              | BS_1-2cm      |
| Body size: 2-4 cm              | BS_2-4cm      |
| Body size: 4-8 cm              | BS_4-8 cm     |
| Body size > 8 cm               | BS_>8cm       |
| Life cycle < 1 year            | LF_<1yr       |
| Life cycle > 1 year            | LF >1yr       |
| Aquatic egg                    | SG_AE         |
| Aquatic larva                  | SG_AL         |
| Aquatic nymph                  | SG_AN         |
| Aquatic adult                  | SG_AA         |
| Sensitive Very Tolerant        | S_Verytol     |
| Sensitive Tolerant             | S_Tol         |
| Sensitive Sensible             | S_Sens        |
| Sensitive Very Sesible         | S_Verysens    |
| Air respiration                | R_Air         |
| Branchial respiration          | R_Branch      |
| Branchial-cutaneos respiration | R_Branch_Cuta |
| Cutaneos respiration           | R_Cuta        |
| Special respiration            | R_Spec        |
| Pulmonar respiration           | R_Pulm        |
| Food: Microorganisms           | F_Micro       |
| Food: Detritus (< 1mm)         | F_Detri       |

|                                  |                |
|----------------------------------|----------------|
| Food: Dead plants (> 1mm)        | F_Deadplants   |
| Food: Microphytes                | F_Microphy     |
| Food: Macrophytes                | F_Macrophy     |
| Food: Dead animals (> 1mm)       | F_Deanimals    |
| Food: Microinvertebrates         | F_Microinv     |
| Food: Macroinvertebrates         | F_Macroinv     |
| Food: Vertebrates                | F_Vert         |
| Collector                        | FG_Col         |
| Predator                         | FG_Pr          |
| Decomposer                       | FG_Dec         |
| Detritivorous                    | FG_Detr        |
| Filtering                        | FG_Ft          |
| Scraper                          | FG_Scr         |
| Shredder                         | FG_Sh          |
| Trans. Dist.: River channel      | TD_River       |
| Trans. Dist.: Banks              | TD_Banks       |
| Trans. Dist.: Ponds, pools       | TD_Ponds       |
| Trans. Dist.: Marshes, peat bogs | TD_Marshes     |
| Trans. Dist.: Temporary waters   | TD_Temp_water  |
| Trans. Dist.: Lakes              | TD_Lakes       |
| Trans. Dist.: Groundwaters       | TD_Groundwater |
| Substrate                        | LG_Sub         |
| Excavator                        | LG_Exc         |
| Climber                          | LG_Clim        |
| Swimmer                          | LG_Swim        |
| Crawler                          | LG_Craw        |
| Walker                           | LG_Walk        |

Table S3: Macroinvertebrate family per main stream and study period.

| Family | Ex_F_17 | Jal_F_17 | CcaSMa_F_17 | Ex_Jul_17 | Jal_Jul_17 | CcaSMa_Jul_17 | Jal_Jun_19 | SGRB  |
|--------|---------|----------|-------------|-----------|------------|---------------|------------|-------|
| Acan   |         |          |             |           |            |               |            | 4     |
| Ancy   |         |          |             |           |            |               |            | 13    |
| Aphi   |         |          |             |           |            |               |            | 398   |
| Asel   |         |          |             |           |            |               |            | 2     |
| Baet   |         |          |             |           |            |               |            | 13921 |
| Belo   |         |          |             |           |            |               |            | 288   |
| Blabe  |         |          |             |           |            |               |            | 1     |
| Calamo |         |          |             |           |            |               |            | 32    |
| Calop  |         |          |             |           |            |               |            | 298   |
| Cerato |         |          |             |           |            |               |            | 517   |
| Chiro  |         |          |             |           |            |               |            | 10656 |
| Chryso |         |          |             |           |            |               |            | 2     |
| Cica   |         |          |             |           |            |               |            | 13    |
| Coena  |         |          |             |           |            |               |            | 845   |
| Collem |         |          |             |           |            |               |            | 1     |
| Corbi  |         |          |             |           |            |               |            | 20    |
| Corix  |         |          |             |           |            |               |            | 46    |
| Cory   |         |          |             |           |            |               |            | 181   |
| Cramb  |         |          |             |           |            |               |            | 148   |
| Culi   |         |          |             |           |            |               |            | 4     |
| Curcu  |         |          |             |           |            |               |            | 6     |
| Dixi   |         |          |             |           |            |               |            | 26    |
| Doli   |         |          |             |           |            |               |            | 10    |
| Dryo   |         |          |             |           |            |               |            | 85    |
| Dyti   |         |          |             |           |            |               |            | 14    |
| Ecno   |         |          |             |           |            |               |            | 3     |
| Elmi   |         |          |             |           |            |               |            | 7239  |
| Empi   |         |          |             |           |            |               |            | 303   |
| Ephy   |         |          |             |           |            |               |            | 53    |
| Geor   |         |          |             |           |            |               |            | 10    |
| Gerri  |         |          |             |           |            |               |            | 154   |
| Glossi |         |          |             |           |            |               |            | 1     |
| Glosso |         |          |             |           |            |               |            | 19    |
| Gomph  |         |          |             |           |            |               |            | 317   |
| Gyri   |         |          |             |           |            |               |            | 12    |
| Hali   |         |          |             |           |            |               |            | 14    |
| Haplo  |         |          |             |           |            |               |            | 66    |
| Hebri  |         |          |             |           |            |               |            | 72    |
| Heli   |         |          |             |           |            |               |            | 276   |
| Hept   |         |          |             |           |            |               |            | 146   |

[illegible]

|       |       |       |      |      |       |      |     |
|-------|-------|-------|------|------|-------|------|-----|
| Trom  |       |       |      |      |       |      | 114 |
| Velii |       |       |      |      |       |      | 630 |
| Xipho | 10900 | 16964 | 5384 | 3758 | 19842 | 7083 | 45  |

\*Values in the SGRB column correspond to the total abundance per family, while the values at the end of each column represent the total abundance by stream and study season.
